# Supplementary material for: Endothelial YAP/TAZ activation promotes atherosclerosis in a mouse model of Hutchinson-Gilford progeria syndrome
Source: PubMed Central journal article supplement (PMC11563688; doi:10.1172/jci173448), 2024-10-01

### Full unedited blot for Figure 3E

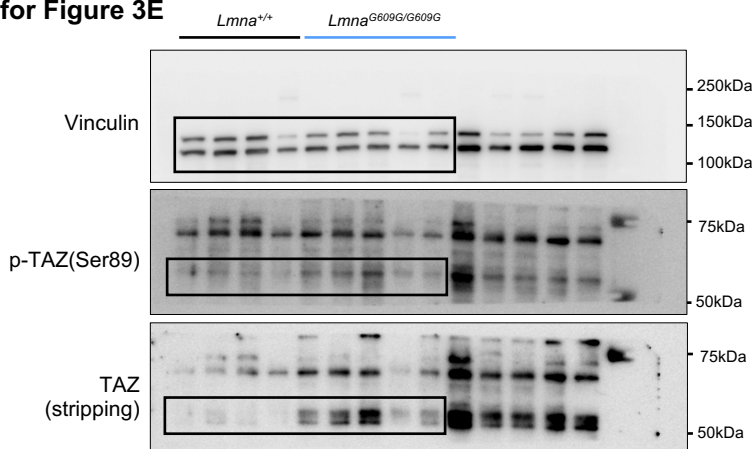

### Full unedited blot for Figure 7A

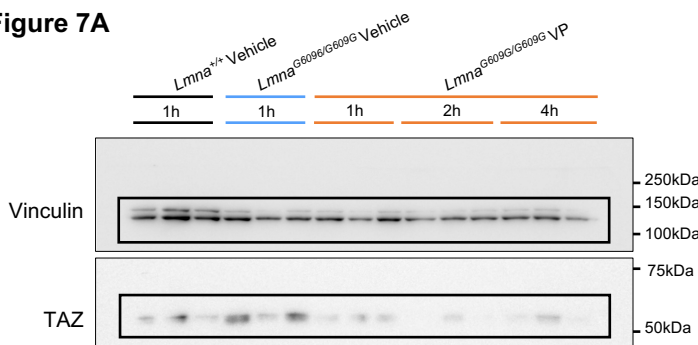

### Full unedited blot for Supplemental Figure 16A

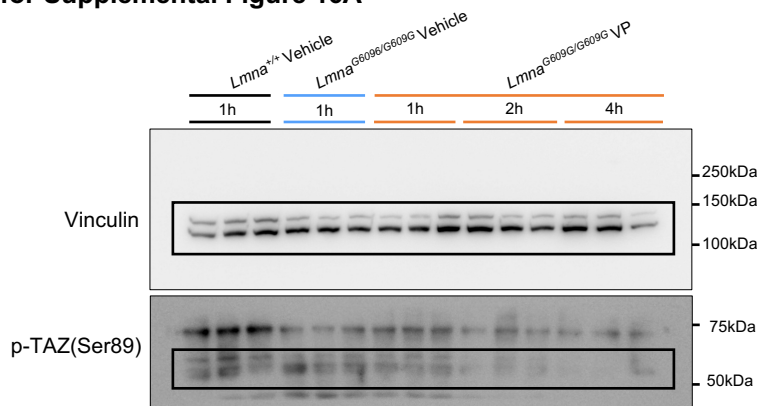

Supplement: jci-134-173448-s010.pdf [file jci-134-173448-s010.pdf]
